# Supplementary material
Source: publisher site journal article supplement (https://www.spandidos-publications.com/1935/downloadSupplementary)
Supplement: Supplementary file 1 [file downloadSupplementary]

## Sheet: Blastx
Table SI. De novo transcriptome analysis with UniProt accession numbers, subject ID and sequence identity.
Target_ID	UniProt accession no.	Subject ID	Identity (%)
comp100023_c0_seq1
comp100024_c0_seq1
comp100032_c0_seq1
comp100039_c0_seq1	P84100	RL19_RAT_60S_ribosomal_protein_L19_OS=Rattus_norvegicus_GN=Rpl19_PE=1_SV=1	100
comp100053_c0_seq1
comp100068_c0_seq1
comp10006_c0_seq1
comp100076_c0_seq1
comp100077_c0_seq1
comp100086_c0_seq1
comp10009_c0_seq1	Q9NYK1	TLR7_HUMAN_Toll-like_receptor_7_OS=Homo_sapiens_GN=TLR7_PE=1_SV=1	51.72
comp100126_c0_seq1
comp100136_c0_seq1
comp100150_c0_seq1
comp100154_c0_seq1
comp100160_c0_seq1
comp10017_c0_seq1
comp10023_c0_seq1
comp10024_c0_seq1
comp100260_c0_seq1	P40936	INMT_MOUSE_Indolethylamine_N-methyltransferase_OS=Mus_musculus_GN=Inmt_PE=2_SV=1	100
comp100276_c0_seq1
comp100318_c0_seq1
comp100326_c0_seq1
comp100351_c0_seq1
comp100355_c0_seq1
comp100360_c0_seq1
comp100365_c0_seq1
comp100398_c0_seq1	P62755	RS6_RAT_40S_ribosomal_protein_S6_OS=Rattus_norvegicus_GN=Rps6_PE=1_SV=1	100
comp100416_c0_seq1
comp100436_c0_seq1
comp100462_c0_seq1
comp100466_c0_seq1
comp100473_c0_seq1
comp100537_c0_seq1
comp100557_c0_seq1
comp100567_c0_seq1
comp10059_c0_seq1
comp100639_c0_seq1	P21614	VTDB_MOUSE_Vitamin_D-binding_protein_OS=Mus_musculus_GN=Gc_PE=1_SV=2	100
comp100675_c0_seq1
comp100685_c0_seq1	Q9JKB5	ARI4B_RAT_AT-rich_interactive_domain-containing_protein_4B_OS=Rattus_norvegicus_GN=Arid4b_PE=2_SV=1	65.67
comp10069_c0_seq1
comp100761_c0_seq1
comp100763_c0_seq1
comp100798_c0_seq1
comp10079_c0_seq1
comp10084_c0_seq1
comp100926_c0_seq1
comp100942_c0_seq1
comp100963_c0_seq1
comp100970_c0_seq1
comp100985_c0_seq1
comp100995_c0_seq1
comp100997_c0_seq1	Q00724	RET4_MOUSE_Retinol-binding_protein_4_OS=Mus_musculus_GN=Rbp4_PE=2_SV=2	100
comp100998_c0_seq1	A7MCS3	CP089_DANRE_UPF0764_protein_C16orf89_homolog_OS=Danio_rerio_PE=2_SV=2	92.17
comp1009_c0_seq1
comp100_c0_seq1
comp100_c1_seq1
comp101005_c0_seq1
comp10100_c0_seq1
comp101020_c0_seq1
comp101032_c0_seq1
comp101041_c0_seq1
comp101060_c0_seq1
comp101090_c0_seq1
comp101130_c0_seq1
comp101151_c0_seq1
comp101228_c0_seq1
comp101255_c0_seq1
comp101271_c0_seq1
comp101311_c0_seq1	P62425	RL7A_RAT_60S_ribosomal_protein_L7a_OS=Rattus_norvegicus_GN=Rpl7a_PE=1_SV=2	100
comp101313_c0_seq1
comp101315_c0_seq1
comp101341_c0_seq1
comp101351_c0_seq1
comp101353_c0_seq1
comp101367_c0_seq1
comp101374_c0_seq1	Q9ES30	C1QT3_MOUSE_Complement_C1q_tumor_necrosis_factor-related_protein_3_OS=Mus_musculus_GN=C1qtnf3_PE=2_SV=1	36.28
comp101392_c0_seq1
comp101467_c0_seq1
comp101483_c0_seq1
comp101496_c0_seq1
comp101516_c0_seq1
comp101521_c0_seq1
comp10152_c0_seq1
comp10155_c0_seq1
comp101562_c0_seq1
comp101566_c0_seq1
comp101574_c0_seq1
comp101596_c0_seq1
comp10159_c0_seq1	Q9W735	PRM1A_DANRE_Prominin-1-A_OS=Danio_rerio_GN=prom1a_PE=2_SV=2	51.33
comp10160_c0_seq1
comp101660_c0_seq1
comp101667_c0_seq1	P28907	CD38_HUMAN_ADP-ribosyl_cyclase_1_OS=Homo_sapiens_GN=CD38_PE=1_SV=2	40.1
comp101682_c0_seq1
comp101703_c0_seq1
comp101722_c0_seq1
comp101762_c0_seq1
comp101765_c0_seq1	Q8N539	FBCD1_HUMAN_Fibrinogen_C_domain-containing_protein_1_OS=Homo_sapiens_GN=FIBCD1_PE=1_SV=2	51.36
comp101910_c0_seq1	38.89
comp101928_c0_seq1
comp10192_c0_seq1
comp101952_c0_seq1
comp101962_c0_seq1
comp102005_c0_seq1	Q92878	RAD50_HUMAN_DNA_repair_protein_RAD50_OS=Homo_sapiens_GN=RAD50_PE=1_SV=1	69.74
comp102019_c0_seq1
comp102103_c0_seq1
comp102105_c0_seq1
comp102267_c0_seq1
comp102301_c0_seq1
comp10230_c0_seq1
comp102384_c0_seq1
comp102398_c0_seq1
comp1023_c0_seq1
comp102412_c0_seq1
comp102429_c0_seq1
comp102452_c0_seq1
comp10245_c0_seq1
comp102464_c0_seq1
comp102488_c0_seq1
comp102493_c0_seq1	P29314	RS9_RAT_40S_ribosomal_protein_S9_OS=Rattus_norvegicus_GN=Rps9_PE=1_SV=4	100
comp102516_c0_seq1	Q5R5A0	ANXA2_PONAB_Annexin_A2_OS=Pongo_abelii_GN=ANXA2_PE=2_SV=1	100
comp102524_c0_seq1
comp102541_c0_seq1
comp102558_c0_seq1
comp102564_c0_seq1	A4VHM9	RS10_PSEU5_30S_ribosomal_protein_S10_OS=Pseudomonas_stutzeri_(strain_A1501)_GN=rpsJ_PE=3_SV=1	100
comp102580_c0_seq1
comp102586_c0_seq1
comp102609_c0_seq1	P29401	TKT_HUMAN_Transketolase_OS=Homo_sapiens_GN=TKT_PE=1_SV=3	70.51
comp102616_c0_seq1
comp102641_c0_seq1
comp10264_c0_seq1
comp102652_c0_seq1	Q28177	BFSP2_BOVIN_Phakinin_OS=Bos_taurus_GN=BFSP2_PE=1_SV=1	53.85
comp102662_c0_seq1
comp102678_c0_seq1
comp102680_c0_seq1
comp102683_c0_seq1
comp1026_c0_seq1
comp102707_c0_seq1
comp102716_c0_seq1	P50607	TUB_HUMAN_Tubby_protein_homolog_OS=Homo_sapiens_GN=TUB_PE=1_SV=1	56
comp102746_c0_seq1
comp102748_c0_seq1	O54967	ACK1_MOUSE_Activated_CDC42_kinase_1_OS=Mus_musculus_GN=Tnk2_PE=1_SV=2	79.17
comp102775_c0_seq1
comp102789_c0_seq1
comp102795_c0_seq1
comp102817_c0_seq1
comp102894_c0_seq1
comp102908_c0_seq1
comp102917_c0_seq1
comp102933_c0_seq1	Q9BQN1	FA83C_HUMAN_Protein_FAM83C_OS=Homo_sapiens_GN=FAM83C_PE=1_SV=3	63.77
comp102959_c0_seq1
comp102963_c0_seq1	P02675	FIBB_HUMAN_Fibrinogen_beta_chain_OS=Homo_sapiens_GN=FGB_PE=1_SV=2	45.45
comp102991_c0_seq1
comp103007_c0_seq1
comp10300_c0_seq1
comp103070_c0_seq1
comp103093_c0_seq1
comp103097_c0_seq1
comp1030_c0_seq1
comp10311_c0_seq1
comp103136_c0_seq1	Q96Q27	ASB2_HUMAN_Ankyrin_repeat_and_SOCS_box_protein_2_OS=Homo_sapiens_GN=ASB2_PE=1_SV=1	45.68
comp103138_c0_seq1
comp103214_c0_seq1
comp103218_c0_seq1
comp103220_c0_seq1
comp103269_c0_seq1	Q8IZJ3	CPMD8_HUMAN_C3_and_PZP-like_alpha-2-macroglobulin_domain-containing_protein_8_OS=Homo_sapiens_GN=CPAMD8_PE=1_SV=2	66.01
comp103295_c0_seq1
comp103307_c0_seq1
comp103316_c0_seq1
comp103354_c0_seq1
comp103398_c0_seq1
comp103398_c0_seq2
comp103402_c0_seq1
comp103423_c0_seq1
comp103442_c0_seq1
comp103462_c0_seq1
comp103484_c0_seq1
comp103507_c0_seq1
comp103557_c0_seq1	A7XYJ6	SOBPB_DANRE_Sine_oculis-binding_protein_homolog_OS=Danio_rerio_GN=sobpb_PE=2_SV=1	63.53
comp10357_c0_seq1	Q14149	MORC3_HUMAN_MORC_family_CW-type_zinc_finger_protein_3_OS=Homo_sapiens_GN=MORC3_PE=1_SV=3	57.14
comp10357_c0_seq2	Q14149	MORC3_HUMAN_MORC_family_CW-type_zinc_finger_protein_3_OS=Homo_sapiens_GN=MORC3_PE=1_SV=3	50.57
comp1035_c0_seq1
comp103644_c0_seq1
comp103657_c0_seq1
comp103691_c0_seq1
comp1036_c0_seq1
comp103704_c0_seq1
comp10370_c0_seq1
comp103728_c0_seq1
comp103781_c0_seq1	P02792	FRIL_HUMAN_Ferritin_light_chain_OS=Homo_sapiens_GN=FTL_PE=1_SV=2	100
comp10380_c0_seq1
comp103918_c0_seq1
comp103947_c0_seq1
comp10394_c0_seq1
comp103963_c0_seq1
comp10404_c0_seq1
comp104057_c0_seq1
comp104083_c0_seq1
comp104102_c0_seq1	P50405	PSPB_MOUSE_Pulmonary_surfactant-associated_protein_B_OS=Mus_musculus_GN=Sftpb_PE=2_SV=1	100
comp104115_c0_seq1
comp104122_c0_seq1
comp104125_c0_seq1
comp104130_c0_seq1
comp104155_c0_seq1	P18715	ZG26_XENLA_Gastrula_zinc_finger_protein_XlCGF26.1_(Fragment)_OS=Xenopus_laevis_PE=3_SV=1	46.48
comp104178_c0_seq1
comp104182_c0_seq1
comp104192_c0_seq1
comp10420_c0_seq1
comp104212_c0_seq1	Q8MJ05	RP1_BOVIN_Oxygen-regulated_protein_1_OS=Bos_taurus_GN=RP1_PE=2_SV=1	39.86
comp104220_c0_seq1
comp104259_c0_seq1
comp104264_c0_seq1
comp104274_c0_seq1
comp104275_c0_seq1
comp104331_c0_seq1
comp104355_c0_seq1
comp10435_c0_seq1
comp104380_c0_seq1
comp104403_c0_seq1
comp104442_c0_seq1	Q5R9B8	DCAF6_PONAB_DDB1-_and_CUL4-associated_factor_6_OS=Pongo_abelii_GN=DCAF6_PE=2_SV=2	78.79
comp104445_c0_seq1
comp104446_c0_seq1
comp10446_c0_seq1
comp104522_c0_seq1
comp104567_c0_seq1	P03899	NU3M_MOUSE_NADH-ubiquinone_oxidoreductase_chain_3_OS=Mus_musculus_GN=Mtnd3_PE=3_SV=3	91.3
comp104642_c0_seq1
comp104656_c0_seq1
comp104665_c0_seq1
comp104675_c0_seq1
comp1046_c0_seq1
comp104701_c0_seq1
comp104711_c0_seq1
comp104728_c0_seq1
comp104758_c0_seq1
comp104766_c0_seq1
comp104774_c0_seq1
comp10477_c0_seq1
comp104791_c0_seq1
comp104802_c0_seq1
comp104853_c0_seq1
comp10488_c0_seq1
comp1049_c0_seq1	P47898	5HT5A_HUMAN_5-hydroxytryptamine_receptor_5A_OS=Homo_sapiens_GN=HTR5A_PE=1_SV=1	86.21
comp10501_c0_seq1
comp105132_c0_seq1
comp105149_c0_seq1
comp105168_c0_seq1
comp105182_c0_seq1
comp105188_c0_seq1	P24591	IBP1_BOVIN_Insulin-like_growth_factor-binding_protein_1_OS=Bos_taurus_GN=IGFBP1_PE=2_SV=2	41.67
comp10519_c0_seq1
comp105207_c0_seq1
comp105209_c0_seq1
comp105211_c0_seq1	Q8N568	DCLK2_HUMAN_Serine/threonine-protein_kinase_DCLK2_OS=Homo_sapiens_GN=DCLK2_PE=2_SV=4	78.82
comp105223_c0_seq1
comp105225_c0_seq1
comp105231_c0_seq1
comp105276_c0_seq1
comp105285_c0_seq1
comp105288_c0_seq1	Q58EG3	PVRL3_DANRE_Poliovirus_receptor-related_protein_3-like_OS=Danio_rerio_GN=pvrl3l_PE=1_SV=2	56.52
comp10530_c0_seq1
comp105315_c0_seq1	Q98902	L1CAM_TAKRU_Neural_cell_adhesion_molecule_L1_OS=Takifugu_rubripes_GN=l1cam_PE=3_SV=1	54.5
comp105319_c0_seq1
comp105327_c0_seq1
comp105345_c0_seq1	A0JPE1	FA69B_XENTR_Protein_FAM69B_OS=Xenopus_tropicalis_GN=fam69b_PE=2_SV=1	64.43
comp105357_c0_seq1
comp105359_c0_seq1
comp105385_c0_seq1
comp105455_c0_seq1
comp105478_c0_seq1
comp105504_c0_seq1
comp105524_c0_seq1
comp105568_c0_seq1	P02714	ACHG_TORCA_Acetylcholine_receptor_subunit_gamma_OS=Torpedo_californica_GN=CHRNG_PE=1_SV=1	65
comp105602_c0_seq1
comp105623_c0_seq1
comp105743_c0_seq1
comp10576_c0_seq1	Q9BYK8	PR285_HUMAN_Peroxisomal_proliferator-activated_receptor_A-interacting_complex_285_kDa_protein_OS=Homo_sapiens_GN=PRIC285_PE=1_SV=6	45.35
comp105841_c0_seq1
comp105884_c0_seq1
comp10588_c0_seq1
comp105896_c0_seq1
comp105899_c0_seq1
comp105914_c0_seq1
comp105915_c0_seq1	Q9UDY8	MALT1_HUMAN_Mucosa-associated_lymphoid_tissue_lymphoma_translocation_protein_1_OS=Homo_sapiens_GN=MALT1_PE=1_SV=1	72.88
comp105919_c0_seq1
comp105920_c0_seq1
comp105921_c0_seq1
comp105930_c0_seq1
comp105939_c0_seq1
comp105954_c0_seq1
comp105960_c0_seq1
comp105967_c0_seq1
comp105970_c0_seq1
comp105989_c0_seq1
comp106001_c0_seq1
comp106013_c0_seq1
comp106019_c0_seq1
comp106056_c0_seq1
comp106065_c0_seq1
comp106075_c0_seq1
comp106076_c0_seq1
comp106079_c0_seq1
comp106083_c0_seq1
comp106085_c0_seq1	Q69Z99	ZN512_MOUSE_Zinc_finger_protein_512_OS=Mus_musculus_GN=Znf512_PE=2_SV=2	58.45
comp106115_c0_seq1
comp106152_c0_seq1
comp106158_c0_seq1	P36578	RL4_HUMAN_60S_ribosomal_protein_L4_OS=Homo_sapiens_GN=RPL4_PE=1_SV=5	100
comp106172_c0_seq1
comp106196_c0_seq1	Q9NWZ5	UCKL1_HUMAN_Uridine-cytidine_kinase-like_1_OS=Homo_sapiens_GN=UCKL1_PE=1_SV=2	74.77
comp10619_c0_seq1
comp106210_c0_seq1
comp106228_c0_seq1
comp106229_c0_seq1
comp106232_c0_seq1
comp106252_c0_seq1
comp106253_c0_seq1
comp10628_c0_seq1
comp1062_c0_seq1
comp10630_c0_seq1
comp106327_c0_seq1
comp106351_c0_seq1
comp106371_c0_seq1
comp106373_c0_seq1	P02461	CO3A1_HUMAN_Collagen_alpha-1(III)_chain_OS=Homo_sapiens_GN=COL3A1_PE=1_SV=4	99.6
comp106393_c0_seq1
comp106400_c0_seq1
comp106413_c0_seq1
comp106475_c0_seq1
comp106486_c0_seq1
comp106507_c0_seq1
comp106555_c0_seq1
comp10655_c0_seq1
comp106563_c0_seq1
comp106583_c0_seq1
comp106623_c0_seq1
comp106641_c0_seq1
comp106644_c0_seq1
comp106664_c0_seq1
comp106671_c0_seq1
comp106724_c0_seq1
comp106739_c0_seq1
comp106743_c0_seq1
comp106744_c0_seq1
comp106765_c0_seq1	D3ZUA0	MTD2L_RAT_Probable_bifunctional_methylenetetrahydrofolate_dehydrogenase/cyclohydrolase_2_OS=Rattus_norvegicus_GN=Mthfd2l_PE=1_SV=1	61.45
comp106767_c0_seq1	Q7SZS1	SX21A_DANRE_Transcription_factor_Sox-21-A_OS=Danio_rerio_GN=sox21a_PE=2_SV=1	100
comp106777_c0_seq1
comp106778_c0_seq1
comp106834_c0_seq1
comp106847_c0_seq1	Q5PYH7	DLG2_DANRE_Disks_large_homolog_2_OS=Danio_rerio_GN=dlg2_PE=2_SV=1	89.02
comp106853_c0_seq1
comp106856_c0_seq1
comp106874_c0_seq1
comp106876_c0_seq1
comp106904_c0_seq1
comp106919_c0_seq1
comp106921_c0_seq1
comp106923_c0_seq1
comp106938_c0_seq1
comp106949_c0_seq1
comp106951_c0_seq1
comp106960_c0_seq1
comp10702_c0_seq1
comp107108_c0_seq1
comp107114_c0_seq1
comp107136_c0_seq1
comp107188_c0_seq1
comp107204_c0_seq1	Q6DK99	CNFNB_XENLA_Cornifelin_homolog_B_OS=Xenopus_laevis_GN=cnfn-b_PE=3_SV=1	42.48
comp10722_c0_seq1
comp107244_c0_seq1
comp107255_c0_seq1	P15881	ITF2_CANFA_Transcription_factor_4_OS=Canis_familiaris_GN=TCF4_PE=2_SV=2	71.43
comp10726_c0_seq1
comp107345_c0_seq1
comp10740_c0_seq1
comp107410_c0_seq1
comp107495_c0_seq1
comp1074_c0_seq1
comp107514_c0_seq1
comp1075_c0_seq1
comp10762_c0_seq1
comp107633_c0_seq1
comp10766_c0_seq1
comp107674_c0_seq1
comp107701_c0_seq1	Q91Y97	ALDOB_MOUSE_Fructose-bisphosphate_aldolase_B_OS=Mus_musculus_GN=Aldob_PE=1_SV=3	100
comp107734_c0_seq1
comp107762_c0_seq1
comp107789_c0_seq1
comp1077_c0_seq1	P70549	NAC3_RAT_Sodium/calcium_exchanger_3_OS=Rattus_norvegicus_GN=Slc8a3_PE=2_SV=1	57.45
comp107802_c0_seq1
comp107813_c0_seq1
comp107839_c0_seq1
comp107841_c0_seq1
comp107874_c0_seq1
comp107877_c0_seq1
comp107878_c0_seq1
comp107890_c0_seq1
comp107895_c0_seq1	P83273	HBB2_ANAMI_Hemoglobin_subunit_beta-2_OS=Anarhichas_minor_GN=hbb2_PE=1_SV=1	82.11
comp107908_c0_seq1
comp107923_c0_seq1
comp107929_c0_seq1
comp107943_c0_seq1
comp107949_c0_seq1
comp107956_c0_seq1
comp107958_c0_seq1	Q3UHC2	LRRK1_MOUSE_Leucine-rich_repeat_serine/threonine-protein_kinase_1_OS=Mus_musculus_GN=Lrrk1_PE=2_SV=1	50.57
comp107958_c0_seq2	Q3UHC2	LRRK1_MOUSE_Leucine-rich_repeat_serine/threonine-protein_kinase_1_OS=Mus_musculus_GN=Lrrk1_PE=2_SV=1	50.57
comp107964_c0_seq1
comp10797_c0_seq1	Q8N1I0	DOCK4_HUMAN_Dedicator_of_cytokinesis_protein_4_OS=Homo_sapiens_GN=DOCK4_PE=1_SV=3	79.1
comp107980_c0_seq1	P28476	GBRR2_HUMAN_Gamma-aminobutyric_acid_receptor_subunit_rho-2_OS=Homo_sapiens_GN=GABRR2_PE=2_SV=4	70.59
comp107993_c0_seq1
comp107995_c0_seq1
comp1079_c0_seq1
comp108000_c0_seq1	Q8VCX6	KPTN_MOUSE_Kaptin_OS=Mus_musculus_GN=Kptn_PE=2_SV=1	62.3
comp108045_c0_seq1	Q5R8K6	RL35A_PONAB_60S_ribosomal_protein_L35a_OS=Pongo_abelii_GN=RPL35A_PE=3_SV=1	100
comp108061_c0_seq1
comp108102_c0_seq1
comp108121_c0_seq1
comp108153_c0_seq1
comp108180_c0_seq1
comp108184_c0_seq1
comp108204_c0_seq1
comp108205_c0_seq1
comp108207_c0_seq1
comp108210_c0_seq1
comp108215_c0_seq1
comp108223_c0_seq1
comp108240_c0_seq1
comp108291_c0_seq1
comp108298_c0_seq1
comp108302_c0_seq1
comp108309_c0_seq1
comp108320_c0_seq1
comp108324_c0_seq1	O43303	CP110_HUMAN_Centriolar_coiled-coil_protein_of_110_kDa_OS=Homo_sapiens_GN=CCP110_PE=1_SV=3	47.48
comp108325_c0_seq1
comp108335_c0_seq1
comp108358_c0_seq1
comp108399_c0_seq1	P85972	VINC_RAT_Vinculin_OS=Rattus_norvegicus_GN=Vcl_PE=1_SV=1	92.73
comp1083_c0_seq1
comp108439_c0_seq1
comp108479_c0_seq1
comp108482_c0_seq1
comp108492_c0_seq1
comp108510_c0_seq1
comp10852_c0_seq1
comp108561_c0_seq1
comp108561_c0_seq2
comp108593_c0_seq1
comp108594_c0_seq1
comp108595_c0_seq1	P62752	RL23A_RAT_60S_ribosomal_protein_L23a_OS=Rattus_norvegicus_GN=Rpl23a_PE=2_SV=1	99.07
comp108606_c0_seq1
comp108610_c0_seq1
comp10861_c0_seq1	Q6P823	H33_XENTR_Histone_H3.3_OS=Xenopus_tropicalis_GN=TGas113e22.1_PE=1_SV=3	100
comp108635_c0_seq1
comp108668_c0_seq1
comp108675_c0_seq1
comp108678_c0_seq1
comp108693_c0_seq1
comp10869_c0_seq1	Q26250	VATL_NEPNO_V-type_proton_ATPase_16_kDa_proteolipid_subunit_OS=Nephrops_norvegicus_PE=2_SV=1	93.33
comp1086_c0_seq1
comp108705_c0_seq1
comp108711_c0_seq1
comp108783_c0_seq1	P97351	RS3A_MOUSE_40S_ribosomal_protein_S3a_OS=Mus_musculus_GN=Rps3a_PE=1_SV=3	100
comp10878_c0_seq1
comp108810_c0_seq1
comp108833_c0_seq1
comp108847_c0_seq1
comp108851_c0_seq1
comp108855_c0_seq1
comp108863_c0_seq1
comp1088_c0_seq1
comp108907_c0_seq1
comp108907_c0_seq2
comp108937_c0_seq1
comp108984_c0_seq1
comp108987_c0_seq1
comp108991_c0_seq1
comp109050_c0_seq1
comp109050_c0_seq2
comp109055_c0_seq1
comp109099_c0_seq1	P62919	RL8_RAT_60S_ribosomal_protein_L8_OS=Rattus_norvegicus_GN=Rpl8_PE=2_SV=2	100
comp10911_c0_seq1
comp109138_c0_seq1
comp109155_c0_seq1	Q8BL06	UBP54_MOUSE_Inactive_ubiquitin_carboxyl-terminal_hydrolase_54_OS=Mus_musculus_GN=Usp54_PE=1_SV=2	61.07
comp10917_c0_seq1
comp109200_c0_seq1
comp109214_c0_seq1
comp109249_c0_seq1
comp109275_c0_seq1
comp109380_c0_seq1
comp109393_c0_seq1
comp109399_c0_seq1
comp1093_c0_seq1
comp109419_c0_seq1
comp10945_c0_seq1
comp10948_c0_seq1
comp10951_c0_seq1
comp109554_c0_seq1
comp109658_c0_seq1
comp109716_c0_seq1
comp10972_c0_seq1	P81908	CHLE_HORSE_Cholinesterase_OS=Equus_caballus_GN=BCHE_PE=1_SV=1	42.47
comp10974_c0_seq1
comp109779_c0_seq1
comp10980_c0_seq1
comp10982_c0_seq1
comp109854_c0_seq1
comp109859_c0_seq1
comp109866_c0_seq1	Q9HB75	PIDD_HUMAN_p53-induced_protein_with_a_death_domain_OS=Homo_sapiens_GN=PIDD_PE=1_SV=2	44.07
comp109867_c0_seq1
comp109869_c0_seq1	P84100	RL19_RAT_60S_ribosomal_protein_L19_OS=Rattus_norvegicus_GN=Rpl19_PE=1_SV=1	100
comp10988_c0_seq1
comp109896_c0_seq1
comp10989_c0_seq1
comp1098_c0_seq1
comp109922_c0_seq1
comp109955_c0_seq1
comp109956_c0_seq1
comp109991_c0_seq1
comp109999_c0_seq1
comp1099_c0_seq1
comp11001_c0_seq1
comp110050_c0_seq1
comp11005_c0_seq1
comp110072_c0_seq1
comp110091_c0_seq1
comp110100_c0_seq1	P34852	NU4M_ANOGA_NADH-ubiquinone_oxidoreductase_chain_4_OS=Anopheles_gambiae_GN=mt:ND4_PE=3_SV=1	61.54
comp110104_c0_seq1
comp110112_c0_seq1	P08962	CD63_HUMAN_CD63_antigen_OS=Homo_sapiens_GN=CD63_PE=1_SV=2	100
comp110130_c0_seq1
comp110134_c0_seq1
comp110140_c0_seq1
comp110146_c0_seq1
comp110150_c0_seq1
comp110164_c0_seq1
comp110170_c0_seq1
comp110175_c0_seq1
comp110204_c0_seq1
comp110209_c0_seq1
comp110210_c0_seq1
comp110224_c0_seq1
comp110238_c0_seq1	B5FZS9	RS3A_TAEGU_40S_ribosomal_protein_S3a_OS=Taeniopygia_guttata_GN=RPS3A_PE=2_SV=1	100
comp110254_c0_seq1
comp110255_c0_seq1
comp110262_c0_seq1
comp11027_c0_seq1
comp110282_c0_seq1	A2AQ25	SKT_MOUSE_Sickle_tail_protein_OS=Mus_musculus_GN=Skt_PE=1_SV=1	47.83
comp110293_c0_seq1
comp110307_c0_seq1
comp110322_c0_seq1
comp110353_c0_seq1
comp110367_c0_seq1
comp110403_c0_seq1
comp110405_c0_seq1
comp11040_c0_seq1	O88878	ZFAN5_MOUSE_AN1-type_zinc_finger_protein_5_OS=Mus_musculus_GN=Zfand5_PE=1_SV=1	98.92
comp110414_c0_seq1
comp110419_c0_seq1
comp110420_c0_seq1	P10982	ACT1_ABSGL_Actin-1_(Fragment)_OS=Absidia_glauca_GN=ACT1_PE=3_SV=1	95.16
comp110437_c0_seq1
comp110456_c0_seq1
comp110457_c0_seq1
comp110461_c0_seq1
comp110463_c0_seq1
comp110482_c0_seq1
comp110484_c0_seq1
comp110490_c0_seq1
comp110512_c0_seq1
comp110547_c0_seq1
comp110575_c0_seq1
comp110588_c0_seq1
comp1105_c0_seq1
comp110600_c0_seq1
comp110640_c0_seq1
comp110681_c0_seq1
comp110690_c0_seq1
comp1106_c0_seq1
comp110718_c0_seq1
comp110720_c0_seq1
comp110731_c0_seq1
comp110828_c0_seq1	Q5GIT4	VGFR2_DANRE_Vascular_endothelial_growth_factor_receptor_2_OS=Danio_rerio_GN=kdr_PE=1_SV=2	86.08
comp110829_c0_seq1
comp110851_c0_seq1	Q3SY69	AL1L2_HUMAN_Mitochondrial_10-formyltetrahydrofolate_dehydrogenase_OS=Homo_sapiens_GN=ALDH1L2_PE=1_SV=2	84.29
comp110860_c0_seq1
comp110862_c0_seq1	P01634	KV5A2_MOUSE_Ig_kappa_chain_V-V_region_MOPC_21_OS=Mus_musculus_PE=1_SV=1	48.82
comp110872_c0_seq1
comp110931_c0_seq1
comp110939_c0_seq1
comp110969_c0_seq1
comp111047_c0_seq1
comp111070_c0_seq1
comp111088_c0_seq1
comp111120_c0_seq1
comp111149_c0_seq1
comp11114_c0_seq1
comp111176_c0_seq1
comp111179_c0_seq1	P25155	FA10_CHICK_Coagulation_factor_X_OS=Gallus_gallus_GN=F10_PE=1_SV=1	62.39
comp111186_c0_seq1	Q5RAQ8	RS24_PONAB_40S_ribosomal_protein_S24_OS=Pongo_abelii_GN=RPS24_PE=2_SV=1	100
comp111242_c0_seq1
comp111254_c0_seq1
comp111256_c0_seq1
comp111263_c0_seq1
comp111280_c0_seq1
comp111283_c0_seq1	Q9BXF3	CECR2_HUMAN_Cat_eye_syndrome_critical_region_protein_2_OS=Homo_sapiens_GN=CECR2_PE=1_SV=2	61.29
comp111315_c0_seq1
comp111365_c0_seq1
comp111376_c0_seq1
comp1113_c0_seq1
comp111400_c0_seq1	Q91VS7	MGST1_MOUSE_Microsomal_glutathione_S-transferase_1_OS=Mus_musculus_GN=Mgst1_PE=1_SV=3	100
comp111439_c0_seq1
comp111451_c0_seq1
comp111475_c0_seq1	Q5U2X4	DPEP3_RAT_Dipeptidase_3_OS=Rattus_norvegicus_GN=Dpep3_PE=2_SV=1	51.82
comp1114_c0_seq1
comp111519_c0_seq1
comp111531_c0_seq1	Q5FWL3	RNF41_XENLA_E3_ubiquitin-protein_ligase_NRDP1_OS=Xenopus_laevis_GN=rnf41_PE=2_SV=1	36.98
comp111575_c0_seq1
comp11159_c0_seq1
comp111653_c0_seq1	Q5RGB8	KLH26_DANRE_Kelch-like_protein_26_OS=Danio_rerio_GN=klhl26_PE=2_SV=1	96.77
comp111660_c0_seq1
comp111699_c0_seq1
comp1116_c0_seq1
comp111710_c0_seq1
comp111714_c0_seq1
comp111719_c0_seq1
comp111723_c0_seq1
comp111736_c0_seq1
comp11173_c0_seq1
comp11175_c0_seq1
comp111770_c0_seq1
comp111836_c0_seq1
comp111913_c0_seq1
comp11191_c0_seq1
comp111932_c0_seq1
comp111937_c0_seq1
comp111954_c0_seq1
comp111966_c0_seq1
comp111981_c0_seq1	O43760	SNG2_HUMAN_Synaptogyrin-2_OS=Homo_sapiens_GN=SYNGR2_PE=1_SV=1	38.1
comp112008_c0_seq1	Q9BZJ8	GPR61_HUMAN_Probable_G-protein_coupled_receptor_61_OS=Homo_sapiens_GN=GPR61_PE=2_SV=2	56.1
comp112039_c0_seq1
comp112099_c0_seq1	Q90665	SEM4D_CHICK_Semaphorin-4D_(Fragment)_OS=Gallus_gallus_GN=SEMA4D_PE=2_SV=1	67.18
comp1120_c0_seq1
comp112150_c0_seq1
comp112287_c0_seq1	P62718	RL18A_RAT_60S_ribosomal_protein_L18a_OS=Rattus_norvegicus_GN=Rpl18a_PE=2_SV=1	97.7
comp11236_c0_seq1
comp112404_c0_seq1
comp112406_c0_seq1
comp11240_c0_seq1
comp112431_c0_seq1
comp112449_c0_seq1
comp112457_c0_seq1
comp1124_c0_seq1
comp112509_c0_seq1
comp112646_c0_seq1
comp112652_c0_seq1
comp112657_c0_seq1
comp112657_c0_seq2
comp112698_c0_seq1
comp1126_c0_seq1
comp11271_c0_seq1
comp112721_c0_seq1
comp112722_c0_seq1
comp112731_c0_seq1
comp112738_c0_seq1
comp112741_c0_seq1
comp11274_c0_seq1
comp112754_c0_seq1	Q5REY2	RL27A_PONAB_60S_ribosomal_protein_L27a_OS=Pongo_abelii_GN=RPL27A_PE=2_SV=3	100
comp112765_c0_seq1
comp112781_c0_seq1
comp112782_c0_seq1
comp112796_c0_seq1
comp112800_c0_seq1
comp112807_c0_seq1
comp112820_c0_seq1
comp112823_c0_seq1
comp112824_c0_seq1
comp112859_c0_seq1
comp112865_c0_seq1
comp112870_c0_seq1
comp112871_c0_seq1	B3DJM5	TSH1_DANRE_Teashirt_homolog_1_OS=Danio_rerio_GN=tshz1_PE=2_SV=1	88.89
comp112872_c0_seq1
comp112883_c0_seq1	68.12
comp112914_c0_seq1
comp112932_c0_seq1
comp112933_c0_seq1
comp112973_c0_seq1	Q95SX7	RTBS_DROME_Probable_RNA-directed_DNA_polymerase_from_transposon_BS_OS=Drosophila_melanogaster_GN=RTase_PE=2_SV=1	35.16
comp112990_c0_seq1
comp112996_c0_seq1
comp113001_c0_seq1
comp113022_c0_seq1
comp113029_c0_seq1
comp113060_c0_seq1
comp113076_c0_seq1
comp113108_c0_seq1
comp113114_c0_seq1
comp113124_c0_seq1	P51815	ZN75D_HUMAN_Zinc_finger_protein_75D_OS=Homo_sapiens_GN=ZNF75D_PE=2_SV=2	45.9
comp113160_c0_seq1
comp113166_c0_seq1
comp113175_c0_seq1
comp113184_c0_seq1
comp113194_c0_seq1
comp1131_c0_seq1
comp113216_c0_seq1
comp11323_c0_seq1
comp113245_c0_seq1
comp113257_c0_seq1
comp11325_c0_seq1
comp113274_c0_seq1
comp113291_c0_seq1
comp113298_c0_seq1	Q642H7	RIC8A_DANRE_Synembryn-A_OS=Danio_rerio_GN=ric8a_PE=2_SV=1	94.53
comp113304_c0_seq1
comp113325_c0_seq1
comp113331_c0_seq1	P62912	RL32_RAT_60S_ribosomal_protein_L32_OS=Rattus_norvegicus_GN=Rpl32_PE=1_SV=2	100
comp113341_c0_seq1
comp113342_c0_seq1
comp113353_c0_seq1
comp113367_c0_seq1
comp113381_c0_seq1
comp113402_c0_seq1
comp113406_c0_seq1
comp113428_c0_seq1	Q96J92	WNK4_HUMAN_Serine/threonine-protein_kinase_WNK4_OS=Homo_sapiens_GN=WNK4_PE=1_SV=1	69.41
comp113435_c0_seq1
comp11343_c0_seq1
comp113448_c0_seq1
comp11346_c0_seq1
comp113480_c0_seq1	P62832	RL23_RAT_60S_ribosomal_protein_L23_OS=Rattus_norvegicus_GN=Rpl23_PE=2_SV=1	100
comp113498_c0_seq1
comp113534_c0_seq1
comp113553_c0_seq1
comp113564_c0_seq1
comp113589_c0_seq1
comp11358_c0_seq1
comp113602_c0_seq1
comp113606_c0_seq1	Q7TQN8	GP119_RAT_Glucose-dependent_insulinotropic_receptor_OS=Rattus_norvegicus_GN=Gpr119_PE=2_SV=1	61.11
comp113613_c0_seq1
comp113615_c0_seq1
comp113617_c0_seq1
comp113641_c0_seq1
comp113669_c0_seq1
comp1136_c0_seq1
comp113736_c0_seq1
comp113755_c0_seq1
comp113777_c0_seq1
comp113807_c0_seq1
comp11380_c0_seq1
comp113815_c0_seq1
comp113816_c0_seq1
comp113823_c0_seq1	P06151	LDHA_MOUSE_L-lactate_dehydrogenase_A_chain_OS=Mus_musculus_GN=Ldha_PE=1_SV=3	100
comp11382_c0_seq1
comp113845_c0_seq1
comp113880_c0_seq1
comp113883_c0_seq1
comp114041_c0_seq1
comp114065_c0_seq1
comp114103_c0_seq1	Q86XX4	FRAS1_HUMAN_Extracellular_matrix_protein_FRAS1_OS=Homo_sapiens_GN=FRAS1_PE=2_SV=1	54.12
comp114107_c0_seq1
comp114111_c0_seq1
comp114141_c0_seq1
comp114152_c0_seq1
comp114160_c0_seq1	Q4R907	CB042_MACFA_Uncharacterized_protein_C2orf42_homolog_OS=Macaca_fascicularis_GN=QtsA-11015_PE=2_SV=1	65.61
comp114167_c0_seq1
comp114175_c0_seq1
comp114180_c0_seq1
comp114186_c0_seq1	O89051	ITM2B_MOUSE_Integral_membrane_protein_2B_OS=Mus_musculus_GN=Itm2b_PE=2_SV=1	100
comp114281_c0_seq1
comp114282_c0_seq1
comp114286_c0_seq1
comp114292_c0_seq1
comp114334_c0_seq1
comp114335_c0_seq1
comp114404_c0_seq1
comp114420_c0_seq1	Q0V9V9	TTYH1_XENTR_Protein_tweety_homolog_1_OS=Xenopus_tropicalis_GN=ttyh1_PE=2_SV=2	52.94
comp114425_c0_seq1
comp114480_c0_seq1
comp114496_c0_seq1	A6YRY8	RSSA_SHEEP_40S_ribosomal_protein_SA_OS=Ovis_aries_GN=RPSA_PE=2_SV=1	100
comp114549_c0_seq1
comp114579_c0_seq1	P18729	ZG57_XENLA_Gastrula_zinc_finger_protein_XlCGF57.1_(Fragment)_OS=Xenopus_laevis_PE=3_SV=1	55.88
comp114589_c0_seq1
comp114593_c0_seq1
comp114675_c0_seq1
comp114689_c0_seq1
comp1146_c0_seq1
comp114701_c0_seq1
comp114709_c0_seq1
comp114711_c0_seq1
comp114754_c0_seq1
comp114759_c0_seq1
comp114760_c0_seq1
comp114783_c0_seq1
comp114789_c0_seq1
comp11482_c0_seq1
comp11490_c0_seq1	Q8N815	CNTD1_HUMAN_Cyclin_N-terminal_domain-containing_protein_1_OS=Homo_sapiens_GN=CNTD1_PE=2_SV=2	35.53
comp114916_c0_seq1
comp11492_c0_seq1	P24270	CATA_MOUSE_Catalase_OS=Mus_musculus_GN=Cat_PE=1_SV=4	99.28
comp114941_c0_seq1	Q5E9E1	PDLI1_BOVIN_PDZ_and_LIM_domain_protein_1_OS=Bos_taurus_GN=PDLIM1_PE=2_SV=3	53.41
comp114963_c0_seq1	P27615	SCRB2_RAT_Lysosome_membrane_protein_2_OS=Rattus_norvegicus_GN=Scarb2_PE=1_SV=2	39.83
comp115080_c0_seq1
comp115081_c0_seq1
comp115086_c0_seq1
comp1150_c0_seq1
comp115124_c0_seq1
comp11515_c0_seq1
comp11518_c0_seq1
comp115191_c0_seq1
comp1151_c0_seq1
comp115245_c0_seq1
comp115284_c0_seq1
comp115296_c0_seq1
comp115299_c0_seq1	P16213	B2MG_PONPY_Beta-2-microglobulin_OS=Pongo_pygmaeus_GN=B2M_PE=3_SV=2	100
comp115411_c0_seq1	O70491	STRA6_MOUSE_Stimulated_by_retinoic_acid_gene_6_protein_OS=Mus_musculus_GN=Stra6_PE=1_SV=1	47.91
comp115484_c0_seq1
comp11549_c0_seq1
comp115516_c0_seq1
comp115535_c0_seq1
comp115552_c0_seq1
comp115553_c0_seq1
comp115554_c0_seq1	Q0VA40	SP9_XENTR_Transcription_factor_Sp9_OS=Xenopus_tropicalis_GN=sp9_PE=2_SV=1	48.28
comp115558_c0_seq1
comp115564_c0_seq1	O54898	CAC1G_RAT_Voltage-dependent_T-type_calcium_channel_subunit_alpha-1G_OS=Rattus_norvegicus_GN=Cacna1g_PE=2_SV=2	73.37
comp115580_c0_seq1
comp115584_c0_seq1
comp115604_c0_seq1
comp115609_c0_seq1
comp115611_c0_seq1
comp115612_c0_seq1
comp115616_c0_seq1
comp115628_c0_seq1
comp115653_c0_seq1
comp115656_c0_seq1
comp115657_c0_seq1
comp115659_c0_seq1	O54732	MMP15_MOUSE_Matrix_metalloproteinase-15_OS=Mus_musculus_GN=Mmp15_PE=2_SV=1	82.93
comp115660_c0_seq1
comp115672_c0_seq1
comp115673_c0_seq1
comp115682_c0_seq1
comp115695_c0_seq1
comp115707_c0_seq1
comp11570_c0_seq1
comp115726_c0_seq1
comp115734_c0_seq1
comp115737_c0_seq1
comp115777_c0_seq1
comp115802_c0_seq1
comp115813_c0_seq1
comp115842_c0_seq1
comp115855_c0_seq1
comp115858_c0_seq1
comp115880_c0_seq1
comp115887_c0_seq1
comp115890_c0_seq1
comp115895_c0_seq1
comp1158_c0_seq1
comp115911_c0_seq1
comp115926_c0_seq1
comp115931_c0_seq1
comp115934_c0_seq1
comp115949_c0_seq1
comp115960_c0_seq1
comp115962_c0_seq1
comp115974_c0_seq1
comp115989_c0_seq1
comp115993_c0_seq1
comp116003_c0_seq1
comp116016_c0_seq1
comp116028_c0_seq1
comp116034_c0_seq1
comp116040_c0_seq1
comp116055_c0_seq1
comp116061_c0_seq1
comp116068_c0_seq1
comp116071_c0_seq1	Q61321	SIX4_MOUSE_Homeobox_protein_SIX4_OS=Mus_musculus_GN=Six4_PE=2_SV=1	76.4
comp116075_c0_seq1
comp116087_c0_seq1
comp116095_c0_seq1
comp116109_c0_seq1	P99027	RLA2_MOUSE_60S_acidic_ribosomal_protein_P2_OS=Mus_musculus_GN=Rplp2_PE=1_SV=3	100
comp116120_c0_seq1
comp116124_c0_seq1
comp116131_c0_seq1
comp116161_c0_seq1
comp11617_c0_seq1
comp1161_c0_seq1
comp116200_c0_seq1
comp116202_c0_seq1
comp11620_c0_seq1
comp11620_c0_seq2
comp116216_c0_seq1
comp116217_c0_seq1
comp116220_c0_seq1
comp116266_c0_seq1
comp116268_c0_seq1
comp116309_c0_seq1
comp11630_c0_seq1
comp116311_c0_seq1
comp116313_c0_seq1	Q12923	PTN13_HUMAN_Tyrosine-protein_phosphatase_non-receptor_type_13_OS=Homo_sapiens_GN=PTPN13_PE=1_SV=2	51.95
comp116320_c0_seq1
comp116328_c0_seq1	Q60771	CLD11_MOUSE_Claudin-11_OS=Mus_musculus_GN=Cldn11_PE=1_SV=1	56.47
comp116351_c0_seq1
comp116361_c0_seq1
comp116370_c0_seq1
comp116379_c0_seq1
comp116380_c0_seq1
comp116385_c0_seq1
comp1163_c0_seq1
comp116410_c0_seq1
comp116412_c0_seq1
comp116449_c0_seq1
comp116495_c0_seq1
comp116534_c0_seq1
comp116544_c0_seq1
comp116555_c0_seq1
comp116561_c0_seq1
comp116570_c0_seq1
comp116574_c0_seq1
comp116597_c0_seq1	P47963	RL13_MOUSE_60S_ribosomal_protein_L13_OS=Mus_musculus_GN=Rpl13_PE=2_SV=3	99.47
comp1165_c0_seq1
comp116618_c0_seq1
comp116663_c0_seq1
comp116664_c0_seq1
comp116665_c0_seq1
comp116668_c0_seq1
comp116684_c0_seq1
comp1166_c0_seq1
comp116720_c0_seq1
comp116742_c0_seq1
comp116744_c0_seq1
comp116751_c0_seq1
comp116780_c0_seq1
comp116783_c0_seq1
comp1167_c0_seq1
comp116811_c0_seq1	P14115	RL27A_MOUSE_60S_ribosomal_protein_L27a_OS=Mus_musculus_GN=Rpl27a_PE=2_SV=5	100
comp116812_c0_seq1
comp116855_c0_seq1	Q8NBI6	XXLT1_HUMAN_Xyloside_xylosyltransferase_1_OS=Homo_sapiens_GN=XXYLT1_PE=1_SV=1	84.44
comp116860_c0_seq1
comp116889_c0_seq1
comp116916_c0_seq1
comp11692_c0_seq1
comp116932_c0_seq1
comp116973_c0_seq1
comp116986_c0_seq1
comp1169_c0_seq1
comp117016_c0_seq1
comp117035_c0_seq1
comp117038_c0_seq1
comp117044_c0_seq1
comp117073_c0_seq1
comp117075_c0_seq1
comp117100_c0_seq1	Q5RFZ7	F167A_DANRE_Protein_FAM167A_OS=Danio_rerio_GN=fam167a_PE=2_SV=1	100
comp117133_c0_seq1
comp117160_c0_seq1
comp117185_c0_seq1
comp117206_c0_seq1
comp117221_c0_seq1
comp117227_c0_seq1
comp117232_c0_seq1
comp117240_c0_seq1
comp117246_c0_seq1
comp117255_c0_seq1
comp117267_c0_seq1
comp117276_c0_seq1
comp117285_c0_seq1
comp117367_c0_seq1
comp117387_c0_seq1
comp117413_c0_seq1
comp117419_c0_seq1
comp11742_c0_seq1
comp117432_c0_seq1	O08529	CAN2_MOUSE_Calpain-2_catalytic_subunit_OS=Mus_musculus_GN=Capn2_PE=2_SV=4	52.81
comp117511_c0_seq1	Q7SXB7	MFD4A_DANRE_Major_facilitator_superfamily_domain-containing_protein_4-A_OS=Danio_rerio_GN=mfsd4a_PE=2_SV=1	91.52
comp117577_c0_seq1	Q90WY5	ADA2B_DANRE_Alpha-2B_adrenergic_receptor_OS=Danio_rerio_GN=adra2b_PE=3_SV=1	75.22
comp117618_c0_seq1
comp117651_c0_seq1
comp117660_c0_seq1
comp117665_c0_seq1
comp1176_c0_seq1	P17563	SBP1_MOUSE_Selenium-binding_protein_1_OS=Mus_musculus_GN=Selenbp1_PE=1_SV=2	100
comp117703_c0_seq1
comp117765_c0_seq1	Q90WY5	ADA2B_DANRE_Alpha-2B_adrenergic_receptor_OS=Danio_rerio_GN=adra2b_PE=3_SV=1	77.56
comp117778_c0_seq1	Q68CL5	TPGS2_HUMAN_Tubulin_polyglutamylase_complex_subunit_2_OS=Homo_sapiens_GN=TPGS2_PE=2_SV=2	53.85
comp11788_c0_seq1
comp117901_c0_seq1
comp117916_c0_seq1
comp117924_c0_seq1	Q9ULT0	TTC7A_HUMAN_Tetratricopeptide_repeat_protein_7A_OS=Homo_sapiens_GN=TTC7A_PE=1_SV=3	48.05
comp11797_c0_seq1
comp117_c0_seq1
comp118004_c0_seq1
comp118086_c0_seq1
comp118154_c0_seq1
comp118164_c0_seq1
comp118172_c0_seq1
comp118181_c0_seq1
comp118203_c0_seq1
comp118216_c0_seq1
comp11830_c0_seq1
comp118374_c0_seq1
comp118426_c0_seq1	P63245	GBLP_RAT_Guanine_nucleotide-binding_protein_subunit_beta-2-like_1_OS=Rattus_norvegicus_GN=Gnb2l1_PE=1_SV=3	100
comp118489_c0_seq1
comp118489_c0_seq2
comp11849_c0_seq1
comp118557_c0_seq1
comp118570_c0_seq1
comp11876_c0_seq1	Q80T79	CSMD3_MOUSE_CUB_and_sushi_domain-containing_protein_3_OS=Mus_musculus_GN=Csmd3_PE=2_SV=3	73.12
comp118822_c0_seq1
comp118834_c0_seq1	Q6ZTN6	AN13D_HUMAN_Ankyrin_repeat_domain-containing_protein_13D_OS=Homo_sapiens_GN=ANKRD13D_PE=1_SV=2	67.86
comp118838_c0_seq1
comp118843_c0_seq1	Q28689	MRP2_RABIT_Canalicular_multispecific_organic_anion_transporter_1_OS=Oryctolagus_cuniculus_GN=ABCC2_PE=2_SV=1	46.6
comp118845_c0_seq1	Q91Y97	ALDOB_MOUSE_Fructose-bisphosphate_aldolase_B_OS=Mus_musculus_GN=Aldob_PE=1_SV=3	100
comp118854_c0_seq1
comp118861_c0_seq1
comp118862_c0_seq1
comp118866_c0_seq1
comp118872_c0_seq1
comp118874_c0_seq1
comp118880_c0_seq1	Q2IA00	SPEF2_PIG_Sperm_flagellar_protein_2_OS=Sus_scrofa_GN=SPEF2_PE=2_SV=1	45.62
comp11888_c0_seq1	Q5RCA9	ITB1_PONAB_Integrin_beta-1_OS=Pongo_abelii_GN=ITGB1_PE=2_SV=1	100
comp11888_c0_seq2	Q5RCA9	ITB1_PONAB_Integrin_beta-1_OS=Pongo_abelii_GN=ITGB1_PE=2_SV=1	100
comp118901_c0_seq1	O75128	COBL_HUMAN_Protein_cordon-bleu_OS=Homo_sapiens_GN=COBL_PE=1_SV=2	54.91
comp118925_c0_seq1
comp118932_c0_seq1
comp118954_c0_seq1
comp118973_c0_seq1
comp118978_c0_seq1
comp118995_c0_seq1
comp119000_c0_seq1
comp119004_c0_seq1
comp119032_c0_seq1
comp11903_c0_seq1
comp119041_c0_seq1
comp119053_c0_seq1	Q9P2G3	KLH14_HUMAN_Kelch-like_protein_14_OS=Homo_sapiens_GN=KLHL14_PE=1_SV=2	93.16
comp119076_c0_seq1
comp1190_c0_seq1
comp1190_c0_seq2
comp119110_c0_seq1
comp119111_c0_seq1
comp119112_c0_seq1
comp119118_c0_seq1
comp119120_c0_seq1
comp119138_c0_seq1
comp119142_c0_seq1	Q8WU66	TSEAR_HUMAN_Protein_TSPEAR_OS=Homo_sapiens_GN=TSPEAR_PE=2_SV=2	49.55
comp119142_c0_seq2	Q8WU66	TSEAR_HUMAN_Protein_TSPEAR_OS=Homo_sapiens_GN=TSPEAR_PE=2_SV=2	45
comp119147_c0_seq1
comp119205_c0_seq1
comp119206_c0_seq1
comp11920_c0_seq1
comp119224_c0_seq1
comp119242_c0_seq1	Q8BLQ7	CTR4_MOUSE_Cationic_amino_acid_transporter_4_OS=Mus_musculus_GN=Slc7a4_PE=1_SV=1	83.82
comp119255_c0_seq1
comp119276_c0_seq1
comp119277_c0_seq1
comp119324_c0_seq1
comp119330_c0_seq1
comp119339_c0_seq1
comp119340_c0_seq1
comp119342_c0_seq1
comp119349_c0_seq1
comp119366_c0_seq1
comp119367_c0_seq1
comp11939_c0_seq1
comp119422_c0_seq1
comp119466_c0_seq1
comp11946_c0_seq1
comp119489_c0_seq1
comp119519_c0_seq1
comp119550_c0_seq1	Q05474	UBIM_RAT_Ubiquitin-like_protein_FUBI_OS=Rattus_norvegicus_GN=Fau_PE=2_SV=1	100
comp119585_c0_seq1
comp119591_c0_seq1
comp119596_c0_seq1
comp119634_c0_seq1
comp119645_c0_seq1
comp119651_c0_seq1
comp119667_c0_seq1
comp119680_c0_seq1
comp119688_c0_seq1
comp119726_c0_seq1
comp119729_c0_seq1
comp119739_c0_seq1
comp11973_c0_seq1
comp11974_c0_seq1
comp11974_c0_seq2
comp11974_c0_seq3
comp119775_c0_seq1
comp119787_c0_seq1
comp1197_c0_seq1
comp119805_c0_seq1
comp119808_c0_seq1
comp119813_c0_seq1	O88533	DDC_MOUSE_Aromatic-L-amino-acid_decarboxylase_OS=Mus_musculus_GN=Ddc_PE=2_SV=1	79.17
comp119840_c0_seq1
comp119865_c0_seq1
comp11987_c0_seq1
comp119894_c0_seq1
comp119911_c0_seq1
comp119950_c0_seq1
comp119957_c0_seq1
comp119963_c0_seq1
comp119973_c0_seq1
comp119984_c0_seq1
comp119990_c0_seq1
comp119996_c0_seq1
comp119_c0_seq1
comp120001_c0_seq1
comp120050_c0_seq1
comp120061_c0_seq1
comp120104_c0_seq1
comp120108_c0_seq1	Q9NY59	NSMA2_HUMAN_Sphingomyelin_phosphodiesterase_3_OS=Homo_sapiens_GN=SMPD3_PE=1_SV=1	58.11
comp120118_c0_seq1
comp120127_c0_seq1
comp120129_c0_seq1
comp120141_c0_seq1
comp120156_c0_seq1
comp120170_c0_seq1
comp120179_c0_seq1
comp12018_c0_seq1	P04785	PDIA1_RAT_Protein_disulfide-isomerase_OS=Rattus_norvegicus_GN=P4hb_PE=1_SV=2	97.47
comp120218_c0_seq1
comp120254_c0_seq1
comp120261_c0_seq1
comp120272_c0_seq1
comp120294_c0_seq1
comp120295_c0_seq1
comp1202_c0_seq1
comp120312_c0_seq1
comp12031_c0_seq1
comp120334_c0_seq1
comp120359_c0_seq1
comp120367_c0_seq1	Q92543	SNX19_HUMAN_Sorting_nexin-19_OS=Homo_sapiens_GN=SNX19_PE=1_SV=2	54.41
comp120370_c0_seq1
comp120384_c0_seq1
comp120396_c0_seq1
comp1203_c0_seq1
comp120404_c0_seq1
comp120412_c0_seq1	P03886	NU1M_HUMAN_NADH-ubiquinone_oxidoreductase_chain_1_OS=Homo_sapiens_GN=MT-ND1_PE=1_SV=1	93.11
comp120451_c0_seq1	Q5SP85	CC85A_MOUSE_Coiled-coil_domain-containing_protein_85A_OS=Mus_musculus_GN=Ccdc85a_PE=2_SV=1	70.14
comp120455_c0_seq1
comp1204_c0_seq1
comp120534_c0_seq1
comp120581_c0_seq1
comp120606_c0_seq1
comp12060_c0_seq1
comp120612_c0_seq1
comp12062_c0_seq1
comp120633_c0_seq1
comp120637_c0_seq1
comp120650_c0_seq1
comp120667_c0_seq1
comp120689_c0_seq1
comp1206_c0_seq1	49.7
comp120704_c0_seq1
comp120715_c0_seq1
comp120726_c0_seq1
comp12072_c0_seq1
comp120746_c0_seq1
comp12074_c0_seq1
comp120761_c0_seq1
comp120773_c0_seq1
comp120794_c0_seq1
comp120803_c0_seq1	Q2T9Q7	TCF23_BOVIN_Transcription_factor_23_OS=Bos_taurus_GN=TCF23_PE=2_SV=1	64.94
comp120809_c0_seq1
comp120812_c0_seq1
comp120831_c0_seq1
comp120834_c0_seq1
comp120841_c0_seq1
comp120867_c0_seq1
comp120868_c0_seq1
comp12088_c0_seq1
comp1208_c0_seq1
comp120929_c0_seq1
comp120942_c0_seq1
comp12094_c0_seq1	O88808	TUB_RAT_Tubby_protein_homolog_OS=Rattus_norvegicus_GN=Tub_PE=2_SV=1	81.15
comp120960_c0_seq1
comp120998_c0_seq1
comp121001_c0_seq1
comp121033_c0_seq1
comp121116_c0_seq1	P02545	LMNA_HUMAN_Prelamin-A/C_OS=Homo_sapiens_GN=LMNA_PE=1_SV=1	100
comp121145_c0_seq1
comp121220_c0_seq1	P61354	RL27_RAT_60S_ribosomal_protein_L27_OS=Rattus_norvegicus_GN=Rpl27_PE=2_SV=2	100
comp121225_c0_seq1
comp121227_c0_seq1
comp121258_c0_seq1
comp121334_c0_seq1
comp121376_c0_seq1
comp12139_c0_seq1	Q5DRB6	PCDG4_PANTR_Protocadherin_gamma-A4_OS=Pan_troglodytes_GN=PCDHGA4_PE=3_SV=1	49.25
comp121408_c0_seq1
comp121422_c0_seq1
comp121525_c0_seq1
comp121576_c0_seq1
comp121656_c0_seq1
comp121661_c0_seq1
comp1218_c0_seq1
comp121923_c0_seq1
comp121934_c0_seq1
comp121944_c0_seq1
comp121973_c0_seq1
comp122017_c0_seq1	Q5ZIV9	ADSV_CHICK_Adseverin_OS=Gallus_gallus_GN=SCIN_PE=2_SV=2	77.46
comp122027_c0_seq1	Q5U4T7	BIC1B_XENLA_Protein_bicaudal_C_homolog_1-B_OS=Xenopus_laevis_GN=bicc1-b_PE=2_SV=1	48.54
comp122029_c0_seq1
comp122114_c0_seq1	Q9WU06	AVIL_RAT_Advillin_OS=Rattus_norvegicus_GN=Avil_PE=2_SV=1	59.84
comp12213_c0_seq1
comp122141_c0_seq1	Q3T1J1	IF5A1_RAT_Eukaryotic_translation_initiation_factor_5A-1_OS=Rattus_norvegicus_GN=Eif5a_PE=1_SV=3	100
comp122177_c0_seq1
comp122321_c0_seq1
comp122364_c0_seq1
comp122375_c0_seq1
comp122408_c0_seq1
comp122411_c0_seq1
comp122464_c0_seq1
comp122485_c0_seq1
comp122487_c0_seq1
comp12250_c0_seq1
comp122553_c0_seq1
comp1225_c0_seq1	O73683	A4_TETFL_Amyloid_beta_A4_protein_OS=Tetraodon_fluviatilis_GN=app_PE=2_SV=1	86.96
comp12260_c0_seq1
comp122649_c0_seq1
comp12265_c0_seq1
comp122672_c0_seq1
comp122680_c0_seq1
comp122690_c0_seq1
comp122706_c0_seq1
comp122726_c0_seq1
comp122740_c0_seq1
comp122757_c0_seq1
comp122762_c0_seq1
comp122775_c0_seq1
comp122789_c0_seq1
comp122792_c0_seq1
comp122798_c0_seq1
comp122803_c0_seq1
comp122804_c0_seq1
comp122833_c0_seq1
comp122871_c0_seq1
comp122876_c0_seq1
comp122878_c0_seq1	Q8NCN2	ZBT34_HUMAN_Zinc_finger_and_BTB_domain-containing_protein_34_OS=Homo_sapiens_GN=ZBTB34_PE=2_SV=4	73.17
comp122892_c0_seq1
comp122894_c0_seq1
comp122898_c0_seq1
comp122899_c0_seq1
comp122922_c0_seq1
comp122978_c0_seq1
comp122995_c0_seq1
comp123010_c0_seq1
comp123044_c0_seq1	Q8WWI5	CTL1_HUMAN_Choline_transporter-like_protein_1_OS=Homo_sapiens_GN=SLC44A1_PE=1_SV=1	48.81
comp123056_c0_seq1
comp123059_c0_seq1
comp123062_c0_seq1
comp123069_c0_seq1
comp12309_c0_seq1	P60982	DEST_PIG_Destrin_OS=Sus_scrofa_GN=DSTN_PE=1_SV=3	100
comp123120_c0_seq1
comp123140_c0_seq1	Q920H1	SG3A2_MOUSE_Secretoglobin_family_3A_member_2_OS=Mus_musculus_GN=Scgb3a2_PE=2_SV=1	100
comp123160_c0_seq1
comp123162_c0_seq1
comp123165_c0_seq1
comp123186_c0_seq1
comp123191_c0_seq1
comp123202_c0_seq1
comp123203_c0_seq1
comp123235_c0_seq1	P14543	NID1_HUMAN_Nidogen-1_OS=Homo_sapiens_GN=NID1_PE=1_SV=3	59.62
comp123239_c0_seq1	P32020	NLTP_MOUSE_Non-specific_lipid-transfer_protein_OS=Mus_musculus_GN=Scp2_PE=1_SV=3	100
comp123242_c0_seq1
comp123244_c0_seq1
comp12324_c0_seq1
comp123254_c0_seq1
comp123295_c0_seq1
comp1232_c0_seq1	Q6NVD0	FREM2_MOUSE_FRAS1-related_extracellular_matrix_protein_2_OS=Mus_musculus_GN=Frem2_PE=2_SV=2	62.18
comp123307_c0_seq1
comp123322_c0_seq1
comp123337_c0_seq1
comp123338_c0_seq1
comp123340_c0_seq1
comp123378_c0_seq1
comp123380_c0_seq1
comp123382_c0_seq1
comp123386_c0_seq1
comp123406_c0_seq1
comp123460_c0_seq1
comp123467_c0_seq1
comp12346_c0_seq1
comp123487_c0_seq1
comp123500_c0_seq1
comp123542_c0_seq1
comp123558_c0_seq1
comp123564_c0_seq1
comp123587_c0_seq1	P21531	RL3_RAT_60S_ribosomal_protein_L3_OS=Rattus_norvegicus_GN=Rpl3_PE=1_SV=3	100
comp123607_c0_seq1	P21460	CYTC_MOUSE_Cystatin-C_OS=Mus_musculus_GN=Cst3_PE=2_SV=2	100
comp123608_c0_seq1
comp123614_c0_seq1
comp123622_c0_seq1
comp123651_c0_seq1
comp123681_c0_seq1
comp123698_c0_seq1
comp123699_c0_seq1
comp123715_c0_seq1
comp123738_c0_seq1
comp123752_c0_seq1
comp123762_c0_seq1
comp123796_c0_seq1
comp123820_c0_seq1
comp123823_c0_seq1
comp123829_c0_seq1
comp123869_c0_seq1
comp123918_c0_seq1
comp123935_c0_seq1
comp123942_c0_seq1
comp123945_c0_seq1
comp123988_c0_seq1
comp123989_c0_seq1
comp123997_c0_seq1
comp124012_c0_seq1
comp124080_c0_seq1
comp124087_c0_seq1	Q5H8B9	FREM3_MOUSE_FRAS1-related_extracellular_matrix_protein_3_OS=Mus_musculus_GN=Frem3_PE=2_SV=2	36.44
comp1240_c0_seq1
comp12410_c0_seq1
comp124121_c0_seq1
comp124128_c0_seq1
comp124224_c0_seq1
comp124233_c0_seq1
comp12423_c0_seq1
comp124276_c0_seq1
comp124287_c0_seq1
comp124288_c0_seq1
comp1242_c0_seq1
comp1242_c1_seq1
comp124377_c0_seq1
comp12443_c0_seq1	P48767	NAC1_FELCA_Sodium/calcium_exchanger_1_OS=Felis_catus_GN=SLC8A1_PE=2_SV=1	78.54
comp124450_c0_seq1	Q63507	RL14_RAT_60S_ribosomal_protein_L14_OS=Rattus_norvegicus_GN=Rpl14_PE=1_SV=3	45.58
comp124460_c0_seq1
comp124475_c0_seq1
comp124507_c0_seq1
comp124523_c0_seq1
comp124527_c0_seq1
comp124566_c0_seq1
comp124573_c0_seq1	P63018	HSP7C_RAT_Heat_shock_cognate_71_kDa_protein_OS=Rattus_norvegicus_GN=Hspa8_PE=1_SV=1	99.22
comp124574_c0_seq1
comp124577_c0_seq1
comp124579_c0_seq1	Q9NRJ7	PCDBG_HUMAN_Protocadherin_beta-16_OS=Homo_sapiens_GN=PCDHB16_PE=1_SV=3	54.44
comp12458_c0_seq1	100
comp124631_c0_seq1
comp124641_c0_seq1
comp124652_c0_seq1
comp124654_c0_seq1
comp124655_c0_seq1
comp124661_c0_seq1
comp124673_c0_seq1	P07737	PROF1_HUMAN_Profilin-1_OS=Homo_sapiens_GN=PFN1_PE=1_SV=2	99.25
comp124690_c0_seq1
comp12470_c0_seq1
comp124728_c0_seq1
comp124749_c0_seq1
comp124750_c0_seq1
comp124762_c0_seq1
comp124831_c0_seq1
comp124845_c0_seq1
comp124897_c0_seq1
comp124961_c0_seq1
comp124980_c0_seq1
comp124999_c0_seq1
comp124_c0_seq1
comp12501_c0_seq1
comp125034_c0_seq1
comp125047_c0_seq1
comp125048_c0_seq1
comp125088_c0_seq1	Q6ZVD8	PHLP2_HUMAN_PH_domain_leucine-rich_repeat-containing_protein_phosphatase_2_OS=Homo_sapiens_GN=PHLPP2_PE=1_SV=3	66.34
comp125093_c0_seq1
comp125137_c0_seq1
comp125200_c0_seq1
comp125206_c0_seq1	P46779	RL28_HUMAN_60S_ribosomal_protein_L28_OS=Homo_sapiens_GN=RPL28_PE=1_SV=3	100
comp125232_c0_seq1
comp125234_c0_seq1	A0JMD0	K0664_DANRE_Protein_KIAA0664_homolog_OS=Danio_rerio_GN=zgc:152873_PE=2_SV=1	62.75
comp125250_c0_seq1
comp125289_c0_seq1
comp12530_c0_seq1
comp12532_c0_seq1
comp125336_c0_seq1
comp12539_c0_seq1
comp125445_c0_seq1
comp125467_c0_seq1
comp125474_c0_seq1	P15144	AMPN_HUMAN_Aminopeptidase_N_OS=Homo_sapiens_GN=ANPEP_PE=1_SV=4	99.35
comp125492_c0_seq1
comp125496_c0_seq1
comp125499_c0_seq1
comp125503_c0_seq1
comp125531_c0_seq1
comp125580_c0_seq1
comp125640_c0_seq1
comp125648_c0_seq1
comp125673_c0_seq1
comp125687_c0_seq1
comp125704_c0_seq1
comp125708_c0_seq1	Q6NRZ1	UH1BL_XENLA_UHRF1-binding_protein_1-like_OS=Xenopus_laevis_GN=uhrf1bp1l_PE=2_SV=1	52.56
comp125726_c0_seq1
comp125746_c0_seq1
comp125754_c0_seq1
comp125757_c0_seq1
comp125785_c0_seq1
comp125809_c0_seq1
comp125843_c0_seq1
comp125878_c0_seq1
comp1258_c0_seq1
comp125976_c0_seq1
comp125983_c0_seq1
comp125_c0_seq1
comp126005_c0_seq1
comp126014_c0_seq1
comp126028_c0_seq1
comp126035_c0_seq1
comp12605_c0_seq1
comp126077_c0_seq1
comp126088_c0_seq1
comp126103_c0_seq1
comp126139_c0_seq1
comp126172_c0_seq1
comp126196_c0_seq1
comp12624_c0_seq1
comp126250_c0_seq1
comp1262_c0_seq1
comp1262_c1_seq1
comp126314_c0_seq1	Q8CGV2	TPH2_MOUSE_Tryptophan_5-hydroxylase_2_OS=Mus_musculus_GN=Tph2_PE=2_SV=2	69.35
comp126322_c0_seq1
comp12637_c0_seq1
comp126396_c0_seq1
comp1263_c0_seq1
comp126417_c0_seq1
comp126446_c0_seq1
comp126570_c0_seq1
comp126574_c0_seq1	Q9D1H9	MFAP4_MOUSE_Microfibril-associated_glycoprotein_4_OS=Mus_musculus_GN=Mfap4_PE=1_SV=1	100
comp1265_c0_seq1
comp126608_c0_seq1
comp126638_c0_seq1
comp126696_c0_seq1
comp1267_c0_seq1
comp126861_c0_seq1
comp12686_c0_seq1
comp1268_c0_seq1
comp12690_c0_seq1
comp126932_c0_seq1
comp126934_c0_seq1
comp126949_c0_seq1
comp126962_c0_seq1
comp126976_c0_seq1
comp126979_c0_seq1
comp126990_c0_seq1
comp1269_c0_seq1
comp127017_c0_seq1
comp12701_c0_seq1
comp127021_c0_seq1
comp127027_c0_seq1
comp127028_c0_seq1
comp12703_c0_seq1
comp127065_c0_seq1
comp127095_c0_seq1
comp127096_c0_seq1
comp127106_c0_seq1
comp127109_c0_seq1
comp127115_c0_seq1
comp127117_c0_seq1
comp127132_c0_seq1
comp127152_c0_seq1
comp127153_c0_seq1
comp127170_c0_seq1
comp127171_c0_seq1
comp127178_c0_seq1
comp127202_c0_seq1
comp127205_c0_seq1
comp127217_c0_seq1	Q02878	RL6_HUMAN_60S_ribosomal_protein_L6_OS=Homo_sapiens_GN=RPL6_PE=1_SV=3	100
comp127227_c0_seq1
comp127228_c0_seq1
comp127240_c0_seq1
comp127242_c0_seq1	P27005	S10A8_MOUSE_Protein_S100-A8_OS=Mus_musculus_GN=S100a8_PE=1_SV=3	100
comp127274_c0_seq1	P33435	MMP13_MOUSE_Collagenase_3_OS=Mus_musculus_GN=Mmp13_PE=1_SV=1	40
comp127282_c0_seq1
comp127297_c0_seq1
comp127308_c0_seq1
comp127309_c0_seq1
comp127314_c0_seq1
comp127325_c0_seq1
comp12733_c0_seq1
comp127357_c0_seq1
comp127369_c0_seq1
comp127372_c0_seq1
comp127375_c0_seq1
comp127380_c0_seq1
comp127386_c0_seq1	Q90641	IPKA_CHICK_cAMP-dependent_protein_kinase_inhibitor_alpha_OS=Gallus_gallus_GN=PKIA_PE=3_SV=3	65.45
comp127392_c0_seq1
comp127395_c0_seq1
comp127400_c0_seq1
comp127411_c0_seq1
comp12741_c0_seq1
comp127422_c0_seq1
comp127424_c0_seq1
comp127425_c0_seq1
comp127457_c0_seq1
comp127467_c0_seq1
comp127473_c0_seq1	P21328	RTJK_DROME_RNA-directed_DNA_polymerase_from_mobile_element_jockey_OS=Drosophila_melanogaster_GN=pol_PE=1_SV=1	39.8
comp12748_c0_seq1
comp127494_c0_seq1	O55112	AFF2_MOUSE_AF4/FMR2_family_member_2_OS=Mus_musculus_GN=Aff2_PE=2_SV=2	36.52
comp127497_c0_seq1
comp127511_c0_seq1
comp12751_c0_seq1
comp127539_c0_seq1
comp127545_c0_seq1
comp12754_c0_seq1
comp127553_c0_seq1
comp127555_c0_seq1
comp127574_c0_seq1
comp127581_c0_seq1
comp127585_c0_seq1
comp127590_c0_seq1
comp127602_c0_seq1	O08709	PRDX6_MOUSE_Peroxiredoxin-6_OS=Mus_musculus_GN=Prdx6_PE=1_SV=3	100
comp12760_c0_seq1
comp127634_c0_seq1
comp127639_c0_seq1
comp127650_c0_seq1
comp127683_c0_seq1
comp12768_c0_seq1
comp127697_c0_seq1
comp1276_c0_seq1
comp127711_c0_seq1
comp127714_c0_seq1
comp127716_c0_seq1	Q92038	ACOD_CYPCA_Acyl-CoA_desaturase_OS=Cyprinus_carpio_PE=2_SV=2	74.42
comp127738_c0_seq1
comp12773_c0_seq1
comp127763_c0_seq1	P70406	UCP2_MOUSE_Mitochondrial_uncoupling_protein_2_OS=Mus_musculus_GN=Ucp2_PE=1_SV=1	100
comp127796_c0_seq1	O42222	GDF8_DANRE_Growth/differentiation_factor_8_OS=Danio_rerio_GN=mstnb_PE=2_SV=2	69.23
comp1277_c0_seq1
comp127802_c0_seq1
comp12780_c0_seq1	Q6ZR37	PKHG7_HUMAN_Pleckstrin_homology_domain-containing_family_G_member_7_OS=Homo_sapiens_GN=PLEKHG7_PE=2_SV=1	54.35
comp127812_c0_seq1
comp127817_c0_seq1
comp12782_c0_seq1
comp127835_c0_seq1
comp127848_c0_seq1	Q8MJJ9	FBLN1_CHLAE_Fibulin-1_(Fragment)_OS=Chlorocebus_aethiops_GN=FBLN1_PE=1_SV=1	97.53
comp127875_c0_seq1
comp127878_c0_seq1
comp127882_c0_seq1
comp127896_c0_seq1
comp127905_c0_seq1
comp127913_c0_seq1
comp127932_c0_seq1
comp127939_c0_seq1
comp127979_c0_seq1
comp128002_c0_seq1
comp128020_c0_seq1
comp128025_c0_seq1
comp128027_c0_seq1
comp128033_c0_seq1	P33622	APOC3_MOUSE_Apolipoprotein_C-III_OS=Mus_musculus_GN=Apoc3_PE=2_SV=2	100
comp128072_c0_seq1
comp128089_c0_seq1
comp128097_c0_seq1
comp128111_c0_seq1
comp128140_c0_seq1
comp128155_c0_seq1
comp128162_c0_seq1
comp128167_c0_seq1
comp128173_c0_seq1
comp128200_c0_seq1
comp128222_c0_seq1
comp12822_c0_seq1	P46530	NOTC1_DANRE_Neurogenic_locus_notch_homolog_protein_1_OS=Danio_rerio_GN=notch1a_PE=2_SV=1	92.57
comp128231_c0_seq1
comp128236_c0_seq1
comp128269_c0_seq1
comp128289_c0_seq1
comp12829_c0_seq1
comp1282_c0_seq1
comp128319_c0_seq1
comp128337_c0_seq1
comp128337_c0_seq2
comp128404_c0_seq1
comp128419_c0_seq1	40.62
comp128437_c0_seq1	P18739	ZO10_XENLA_Oocyte_zinc_finger_protein_XlCOF10_(Fragment)_OS=Xenopus_laevis_PE=3_SV=1	44.76
comp128455_c0_seq1
comp128472_c0_seq1
comp128486_c0_seq1
comp128503_c0_seq1	Q8QGQ8	PER2_CHICK_Period_circadian_protein_homolog_2_OS=Gallus_gallus_GN=PER2_PE=2_SV=1	82.35
comp128509_c0_seq1
comp128537_c0_seq1
comp128548_c0_seq1
comp128557_c0_seq1
comp128561_c0_seq1
comp128589_c0_seq1
comp128590_c0_seq1
comp128617_c0_seq1
comp128618_c0_seq1
comp128666_c0_seq1
comp128675_c0_seq1
comp128686_c0_seq1
comp128689_c0_seq1
comp1286_c0_seq1
comp128704_c0_seq1
comp128720_c0_seq1	P14381	YTX2_XENLA_Transposon_TX1_uncharacterized_149_kDa_protein_OS=Xenopus_laevis_PE=4_SV=1	29.86
comp128726_c0_seq1
comp12873_c0_seq1
comp128748_c0_seq1	Q8R0P8	ABHD8_MOUSE_Abhydrolase_domain-containing_protein_8_OS=Mus_musculus_GN=Abhd8_PE=2_SV=1	64.81
comp128751_c0_seq1
comp12875_c0_seq1	Q6DC61	MND1_DANRE_Meiotic_nuclear_division_protein_1_homolog_OS=Danio_rerio_GN=mnd1_PE=2_SV=1	85.71
comp128774_c0_seq1
comp128800_c0_seq1
comp128826_c0_seq1
comp12883_c0_seq1
comp128848_c0_seq1	P24549	AL1A1_MOUSE_Retinal_dehydrogenase_1_OS=Mus_musculus_GN=Aldh1a1_PE=1_SV=5	100
comp128850_c0_seq1
comp128870_c0_seq1
comp128878_c0_seq1
comp128898_c0_seq1	Q28833	VWF_PIG_von_Willebrand_factor_(Fragment)_OS=Sus_scrofa_GN=VWF_PE=2_SV=2	37.58
comp128935_c0_seq1
comp128963_c0_seq1	Q8BR07	BICD1_MOUSE_Protein_bicaudal_D_homolog_1_OS=Mus_musculus_GN=Bicd1_PE=1_SV=2	70.27
comp128_c0_seq1
comp129012_c0_seq1
comp129028_c0_seq1
comp129043_c0_seq1
comp129069_c0_seq1
comp12907_c0_seq1	P13490	LDHB_RABIT_L-lactate_dehydrogenase_B_chain_(Fragment)_OS=Oryctolagus_cuniculus_GN=LDHB_PE=2_SV=1	90.58
comp12907_c0_seq2	P13490	LDHB_RABIT_L-lactate_dehydrogenase_B_chain_(Fragment)_OS=Oryctolagus_cuniculus_GN=LDHB_PE=2_SV=1	98.43
comp12911_c0_seq1
comp129148_c0_seq1
comp129227_c0_seq1
comp129231_c0_seq1
comp129241_c0_seq1
comp129304_c0_seq1	Q5RC60	TIMP1_PONAB_Metalloproteinase_inhibitor_1_OS=Pongo_abelii_GN=TIMP1_PE=2_SV=1	100
comp129307_c0_seq1
comp129323_c0_seq1
comp129345_c0_seq1
comp129348_c0_seq1
comp129361_c0_seq1
comp129416_c0_seq1	P19788	MGP_MOUSE_Matrix_Gla_protein_OS=Mus_musculus_GN=Mgp_PE=2_SV=1	98.84
comp129418_c0_seq1
comp129439_c0_seq1	Q9ULU4	PKCB1_HUMAN_Protein_kinase_C-binding_protein_1_OS=Homo_sapiens_GN=ZMYND8_PE=1_SV=2	77.65
comp129440_c0_seq1
comp129452_c0_seq1
comp129473_c0_seq1
comp129479_c0_seq1
comp129505_c0_seq1
comp12953_c0_seq1
comp129556_c0_seq1
comp129557_c0_seq1
comp129560_c0_seq1
comp129573_c0_seq1
comp129594_c0_seq1
comp1295_c0_seq1
comp1295_c1_seq1
comp129601_c0_seq1
comp129640_c0_seq1
comp129643_c0_seq1
comp129753_c0_seq1
comp129765_c0_seq1
comp1297_c0_seq1	P57717	ESR1_DANRE_Estrogen_receptor_OS=Danio_rerio_GN=esr1_PE=2_SV=2	79.27
comp1297_c1_seq1	P57717	ESR1_DANRE_Estrogen_receptor_OS=Danio_rerio_GN=esr1_PE=2_SV=2	94.2
comp129805_c0_seq1
comp12984_c0_seq1
comp129928_c0_seq1
comp130035_c0_seq1
comp130036_c0_seq1
comp130046_c0_seq1
comp130096_c0_seq1
comp130120_c0_seq1
comp130128_c0_seq1
comp130235_c0_seq1	O93297	CP2K4_ONCMY_Cytochrome_P450_2K4_OS=Oncorhynchus_mykiss_GN=cyp2k4_PE=2_SV=1	59.5
comp130289_c0_seq1
comp130296_c0_seq1
comp1302_c0_seq1
comp13030_c0_seq1
comp130316_c0_seq1
comp130325_c0_seq1
comp13032_c0_seq1
comp13033_c0_seq1
comp13036_c0_seq1
comp130393_c0_seq1
comp13044_c0_seq1
comp130499_c0_seq1
comp1304_c0_seq1
comp130509_c0_seq1
comp130519_c0_seq1
comp13052_c0_seq1	Q6VZZ7	OPN5_MOUSE_Opsin-5_OS=Mus_musculus_GN=Opn5_PE=1_SV=1	42.65
comp130580_c0_seq1
comp13060_c0_seq1
comp13061_c0_seq1
comp130620_c0_seq1
comp130673_c0_seq1
comp130674_c0_seq1
comp130693_c0_seq1
comp13071_c0_seq1
comp130726_c0_seq1
comp130736_c0_seq1
comp130751_c0_seq1
comp130754_c0_seq1
comp130781_c0_seq1
comp130866_c0_seq1
comp130971_c0_seq1
comp131004_c0_seq1
comp131058_c0_seq1	P05387	RLA2_HUMAN_60S_acidic_ribosomal_protein_P2_OS=Homo_sapiens_GN=RPLP2_PE=1_SV=1	100
comp131060_c0_seq1
comp131073_c0_seq1
comp13113_c0_seq1
comp131186_c0_seq1
comp131298_c0_seq1
comp13135_c0_seq1
comp131365_c0_seq1
comp131431_c0_seq1
comp131433_c0_seq1
comp131452_c0_seq1
comp131461_c0_seq1
comp1314_c0_seq1
comp13152_c0_seq1	P29315	RINI_RAT_Ribonuclease_inhibitor_OS=Rattus_norvegicus_GN=Rnh1_PE=1_SV=2	41.18
comp131552_c0_seq1
comp131563_c0_seq1
comp131623_c0_seq1
comp131720_c0_seq1
comp131722_c0_seq1
comp131797_c0_seq1
comp131843_c0_seq1
comp131848_c0_seq1
comp131849_c0_seq1
comp131849_c0_seq2
comp131857_c0_seq1
comp13185_c0_seq1
comp131860_c0_seq1
comp131866_c0_seq1	P06312	KV401_HUMAN_Ig_kappa_chain_V-IV_region_(Fragment)_OS=Homo_sapiens_GN=IGKV4-1_PE=4_SV=1	38.78
comp131868_c0_seq1	P30098	NK3R_CAVPO_Neuromedin-K_receptor_OS=Cavia_porcellus_GN=TACR3_PE=2_SV=1	69.18
comp131898_c0_seq1
comp131907_c0_seq1	P02639	S10A1_BOVIN_Protein_S100-A1_OS=Bos_taurus_GN=S100A1_PE=1_SV=2	63.79
comp131920_c0_seq1
comp131922_c0_seq1
comp131929_c0_seq1
comp131941_c0_seq1
comp131968_c0_seq1
comp131969_c0_seq1
comp131972_c0_seq1	P01739	TVA2_MOUSE_T-cell_receptor_alpha_chain_V_region_2B4_OS=Mus_musculus_PE=1_SV=1	36.11
comp131978_c0_seq1
comp131985_c0_seq1
comp131993_c0_seq1
comp131998_c0_seq1
comp132002_c0_seq1
comp132023_c0_seq1
comp132027_c0_seq1
comp132034_c0_seq1
comp132040_c0_seq1
comp132047_c0_seq1
comp132049_c0_seq1
comp132055_c0_seq1
comp132056_c0_seq1
comp132057_c0_seq1	P12110	CO6A2_HUMAN_Collagen_alpha-2(VI)_chain_OS=Homo_sapiens_GN=COL6A2_PE=1_SV=4	100
comp132060_c0_seq1
comp132071_c0_seq1
comp132078_c0_seq1
comp132079_c0_seq1
comp132086_c0_seq1
comp1320_c0_seq1	Q80XG9	LRRT4_MOUSE_Leucine-rich_repeat_transmembrane_neuronal_protein_4_OS=Mus_musculus_GN=Lrrtm4_PE=2_SV=2	62.96
comp132112_c0_seq1
comp132116_c0_seq1
comp132145_c0_seq1
comp132152_c0_seq1
comp132154_c0_seq1
comp132157_c0_seq1
comp132158_c0_seq1
comp132163_c0_seq1
comp132168_c0_seq1
comp132171_c0_seq1
comp132191_c0_seq1
comp132192_c0_seq1
comp1321_c0_seq1
comp132209_c0_seq1
comp132231_c0_seq1
comp132244_c0_seq1
comp132246_c0_seq1
comp132252_c0_seq1
comp132255_c0_seq1	Q6XIM8	RS15A_DROYA_40S_ribosomal_protein_S15a_OS=Drosophila_yakuba_GN=RpS15Aa_PE=2_SV=3	88.1
comp132279_c0_seq1
comp132280_c0_seq1
comp132287_c0_seq1
comp132290_c0_seq1
comp132307_c0_seq1	Q1JPS6	OPN4L_DANRE_Melanopsin-like_OS=Danio_rerio_GN=opn4l_PE=2_SV=1	91.62
comp132318_c0_seq1	P62919	RL8_RAT_60S_ribosomal_protein_L8_OS=Rattus_norvegicus_GN=Rpl8_PE=2_SV=2	100
comp13231_c0_seq1	P97290	IC1_MOUSE_Plasma_protease_C1_inhibitor_OS=Mus_musculus_GN=Serping1_PE=1_SV=3	100
comp132321_c0_seq1
comp132333_c0_seq1
comp132335_c0_seq1
comp132350_c0_seq1
comp132361_c0_seq1
comp132364_c0_seq1
comp132369_c0_seq1	P02461	CO3A1_HUMAN_Collagen_alpha-1(III)_chain_OS=Homo_sapiens_GN=COL3A1_PE=1_SV=4	100
comp132386_c0_seq1
comp132398_c0_seq1
comp132430_c0_seq1
comp132444_c0_seq1	P62893	RL39_RAT_60S_ribosomal_protein_L39_OS=Rattus_norvegicus_GN=Rpl39_PE=1_SV=2	100
comp132450_c0_seq1
comp132467_c0_seq1	Q96MY1	CT112_HUMAN_Uncharacterized_protein_C20orf112_OS=Homo_sapiens_GN=C20orf112_PE=1_SV=2	48.91
comp132477_c0_seq1
comp132481_c0_seq1
comp132485_c0_seq1	Q28062	PGCB_BOVIN_Brevican_core_protein_OS=Bos_taurus_GN=BCAN_PE=1_SV=1	44.83
comp132491_c0_seq1
comp132494_c0_seq1
comp13250_c0_seq1
comp132522_c0_seq1	Q4R5Q0	RL3_MACFA_60S_ribosomal_protein_L3_OS=Macaca_fascicularis_GN=RPL3_PE=2_SV=3	100
comp132527_c0_seq1	P04939	MUP3_MOUSE_Major_urinary_protein_3_OS=Mus_musculus_GN=Mup3_PE=1_SV=1	99.01
comp132529_c0_seq1
comp132539_c0_seq1
comp132543_c0_seq1
comp13254_c0_seq1
comp132550_c0_seq1
comp132556_c0_seq1
comp132560_c0_seq1
comp132561_c0_seq1
comp132565_c0_seq1
comp132580_c0_seq1	D3YVE8	TMM22_MOUSE_Transmembrane_protein_22_OS=Mus_musculus_GN=Tmem22_PE=3_SV=1	78.95
comp132585_c0_seq1	Q96A58	RERG_HUMAN_Ras-related_and_estrogen-regulated_growth_inhibitor_OS=Homo_sapiens_GN=RERG_PE=1_SV=1	94.87
comp13258_c0_seq1	B6RSP1	PKHA7_DANRE_Pleckstrin_homology_domain-containing_family_A_member_7_OS=Danio_rerio_GN=plekha7_PE=2_SV=2	87.21
comp132597_c0_seq1
comp132599_c0_seq1
comp132642_c0_seq1
comp132651_c0_seq1
comp132654_c0_seq1
comp132662_c0_seq1
comp132663_c0_seq1
comp132670_c0_seq1
comp132671_c0_seq1
comp132697_c0_seq1	Q8N4S7	PAQR4_HUMAN_Progestin_and_adipoQ_receptor_family_member_4_OS=Homo_sapiens_GN=PAQR4_PE=2_SV=3	59.41
comp13270_c0_seq1
comp132715_c0_seq1
comp132718_c0_seq1	Q9Y6U7	RN215_HUMAN_RING_finger_protein_215_OS=Homo_sapiens_GN=RNF215_PE=1_SV=2	47.76
comp132776_c0_seq1
comp132788_c0_seq1
comp132806_c0_seq1
comp132810_c0_seq1
comp132873_c0_seq1
comp132894_c0_seq1	P17014	ZNF12_HUMAN_Zinc_finger_protein_12_OS=Homo_sapiens_GN=ZNF12_PE=2_SV=3	38.46
comp132899_c0_seq1
comp1328_c0_seq1
comp132919_c0_seq1
comp132937_c0_seq1
comp132973_c0_seq1	Q75VX8	FA59B_HUMAN_Protein_FAM59B_OS=Homo_sapiens_GN=FAM59B_PE=2_SV=3	71.08
comp133022_c0_seq1
comp133029_c0_seq1
comp133035_c0_seq1
comp133037_c0_seq1
comp133045_c0_seq1
comp133065_c0_seq1
comp13306_c0_seq1
comp133075_c0_seq1
comp133079_c0_seq1
comp133092_c0_seq1
comp133110_c0_seq1
comp13311_c0_seq1
comp133122_c0_seq1
comp133176_c0_seq1	Q90X49	CCD80_DANRE_Coiled-coil_domain-containing_protein_80_OS=Danio_rerio_GN=ccdc80_PE=2_SV=1	73.98
comp13319_c0_seq1
comp133200_c0_seq1
comp133211_c0_seq1
comp133228_c0_seq1
comp133240_c0_seq1
comp133245_c0_seq1
comp133257_c0_seq1
comp133291_c0_seq1
comp133310_c0_seq1
comp133319_c0_seq1
comp133322_c0_seq1
comp133326_c0_seq1
comp133329_c0_seq1
comp133335_c0_seq1
comp133348_c0_seq1
comp133350_c0_seq1
comp13338_c0_seq1
comp133396_c0_seq1
comp133398_c0_seq1
comp13342_c0_seq1
comp133435_c0_seq1	Q13609	DNSL3_HUMAN_Deoxyribonuclease_gamma_OS=Homo_sapiens_GN=DNASE1L3_PE=1_SV=1	46.3
comp133440_c0_seq1
comp133448_c0_seq1
comp133457_c0_seq1
comp133465_c0_seq1
comp133468_c0_seq1	P08548	LIN1_NYCCO_LINE-1_reverse_transcriptase_homolog_OS=Nycticebus_coucang_PE=1_SV=1	26.95
comp133470_c0_seq1	P07711	CATL1_HUMAN_Cathepsin_L1_OS=Homo_sapiens_GN=CTSL1_PE=1_SV=2	100
comp133541_c0_seq1
comp133585_c0_seq1
comp133586_c0_seq1
comp13358_c0_seq1
comp133604_c0_seq1
comp133608_c0_seq1
comp133620_c0_seq1
comp133633_c0_seq1
comp133650_c0_seq1
comp133654_c0_seq1
comp133680_c0_seq1
comp133689_c0_seq1
comp133714_c0_seq1
comp133744_c0_seq1
comp133754_c0_seq1	P40261	NNMT_HUMAN_Nicotinamide_N-methyltransferase_OS=Homo_sapiens_GN=NNMT_PE=1_SV=1	100
comp133755_c0_seq1
comp133821_c0_seq1
comp133838_c0_seq1
comp133839_c0_seq1
comp133846_c0_seq1
comp133875_c0_seq1
comp133889_c0_seq1	Q16633	OBF1_HUMAN_POU_domain_class_2-associating_factor_1_OS=Homo_sapiens_GN=POU2AF1_PE=1_SV=1	46.74
comp133890_c0_seq1
comp133938_c0_seq1
comp133940_c0_seq1
comp133975_c0_seq1
comp133977_c0_seq1
comp133986_c0_seq1
comp133_c0_seq1	P19491	GRIA2_RAT_Glutamate_receptor_2_OS=Rattus_norvegicus_GN=Gria2_PE=1_SV=2	87.5
comp134002_c0_seq1	P63255	CRIP1_RAT_Cysteine-rich_protein_1_OS=Rattus_norvegicus_GN=Crip1_PE=1_SV=2	100
comp134032_c0_seq1
comp134084_c0_seq1
comp134119_c0_seq1	P04792	HSPB1_HUMAN_Heat_shock_protein_beta-1_OS=Homo_sapiens_GN=HSPB1_PE=1_SV=2	100
comp134174_c0_seq1
comp134176_c0_seq1	94.74
comp1341_c0_seq1
comp134204_c0_seq1
comp134207_c0_seq1
comp134222_c0_seq1
comp134225_c0_seq1
comp134242_c0_seq1
comp134246_c0_seq1
comp134272_c0_seq1
comp134275_c0_seq1
comp134308_c0_seq1
comp134328_c0_seq1
comp134363_c0_seq1
comp134367_c0_seq1
comp134380_c0_seq1
comp134397_c0_seq1
comp134421_c0_seq1
comp134433_c0_seq1
comp134458_c0_seq1
comp134459_c0_seq1
comp134471_c0_seq1
comp134490_c0_seq1
comp134492_c0_seq1
comp134521_c0_seq1
comp134534_c0_seq1
comp134535_c0_seq1
comp134567_c0_seq1
comp134569_c0_seq1
comp134578_c0_seq1
comp1345_c0_seq1
comp134602_c0_seq1	B2GUX4	UBP21_RAT_Ubiquitin_carboxyl-terminal_hydrolase_21_OS=Rattus_norvegicus_GN=Usp21_PE=2_SV=1	49.54
comp134619_c0_seq1	Q9DBX3	SUSD2_MOUSE_Sushi_domain-containing_protein_2_OS=Mus_musculus_GN=Susd2_PE=1_SV=1	42.64
comp134702_c0_seq1
comp13470_c0_seq1
comp134720_c0_seq1
comp134723_c0_seq1
comp13472_c0_seq1	Q8CDN9	LRRC9_MOUSE_Leucine-rich_repeat-containing_protein_9_OS=Mus_musculus_GN=Lrrc9_PE=2_SV=2	53.91
comp134745_c0_seq1
comp134753_c0_seq1
comp134775_c0_seq1
comp1347_c0_seq1
comp134828_c0_seq1
comp134859_c0_seq1
comp134926_c0_seq1
comp134927_c0_seq1
comp134981_c0_seq1
comp135016_c0_seq1
comp135022_c0_seq1
comp13504_c0_seq1
comp135140_c0_seq1
comp135176_c0_seq1
comp135194_c0_seq1
comp135220_c0_seq1
comp135224_c0_seq1
comp135233_c0_seq1
comp135239_c0_seq1
comp135268_c0_seq1	P85857	GDF6A_DANRE_Growth/differentiation_factor_6-A_OS=Danio_rerio_GN=gdf6a_PE=2_SV=1	92.59
comp135270_c0_seq1	P47911	RL6_MOUSE_60S_ribosomal_protein_L6_OS=Mus_musculus_GN=Rpl6_PE=1_SV=3	100
comp135273_c0_seq1
comp135296_c0_seq1
comp1352_c0_seq1
comp135307_c0_seq1	P10394	POL4_DROME_Retrovirus-related_Pol_polyprotein_from_transposon_412_OS=Drosophila_melanogaster_GN=POL_PE=4_SV=1	29.17
comp135316_c0_seq1
comp135336_c0_seq1
comp135417_c0_seq1
comp135418_c0_seq1	Q28833	VWF_PIG_von_Willebrand_factor_(Fragment)_OS=Sus_scrofa_GN=VWF_PE=2_SV=2	50
comp135427_c0_seq1	100
comp135504_c0_seq1
comp135539_c0_seq1
comp135543_c0_seq1
comp135557_c0_seq1
comp135565_c0_seq1
comp135567_c0_seq1
comp135571_c0_seq1
comp135590_c0_seq1
comp135605_c0_seq1
comp13560_c0_seq1
comp135622_c0_seq1
comp135686_c0_seq1	P33267	CP2F2_MOUSE_Cytochrome_P450_2F2_OS=Mus_musculus_GN=Cyp2f2_PE=2_SV=1	100
comp13574_c0_seq1	Q64253	LY6E_MOUSE_Lymphocyte_antigen_6E_OS=Mus_musculus_GN=Ly6e_PE=2_SV=2	100
comp135782_c0_seq1
comp135790_c0_seq1
comp135882_c0_seq1
comp135886_c0_seq1
comp1358_c0_seq1	Q80T14	FRAS1_MOUSE_Extracellular_matrix_protein_FRAS1_OS=Mus_musculus_GN=Fras1_PE=2_SV=2	44.44
comp13590_c0_seq1
comp13598_c0_seq1
comp136054_c0_seq1
comp13605_c0_seq1
comp13607_c0_seq1
comp136108_c0_seq1
comp136110_c0_seq1
comp136168_c0_seq1
comp13616_c0_seq1
comp136257_c0_seq1
comp136269_c0_seq1
comp136321_c0_seq1
comp136331_c0_seq1
comp1363_c0_seq1
comp136425_c0_seq1
comp136477_c0_seq1
comp1364_c0_seq1
comp1364_c0_seq2
comp136556_c0_seq1
comp136558_c0_seq1
comp136578_c0_seq1
comp136652_c0_seq1
comp136671_c0_seq1	O95125	ZN202_HUMAN_Zinc_finger_protein_202_OS=Homo_sapiens_GN=ZNF202_PE=1_SV=4	37.5
comp136725_c0_seq1
comp136729_c0_seq1
comp136748_c0_seq1	Q0IH87	PAX3B_XENLA_Paired_box_protein_Pax-3-B_OS=Xenopus_laevis_GN=pax3-b_PE=2_SV=2	80.12
[truncated: 173,358 more rows]
